# Supplementary material
Source: PubMed Central journal article supplement (PMC4677892)
Supplement: supp_pp.15.00974_PP2015-00974R1_Supplemental_Figure_S1.pdf [file supp_pp.15.00974_PP2015-00974R1_Supplemental_Figure_S1.pdf]

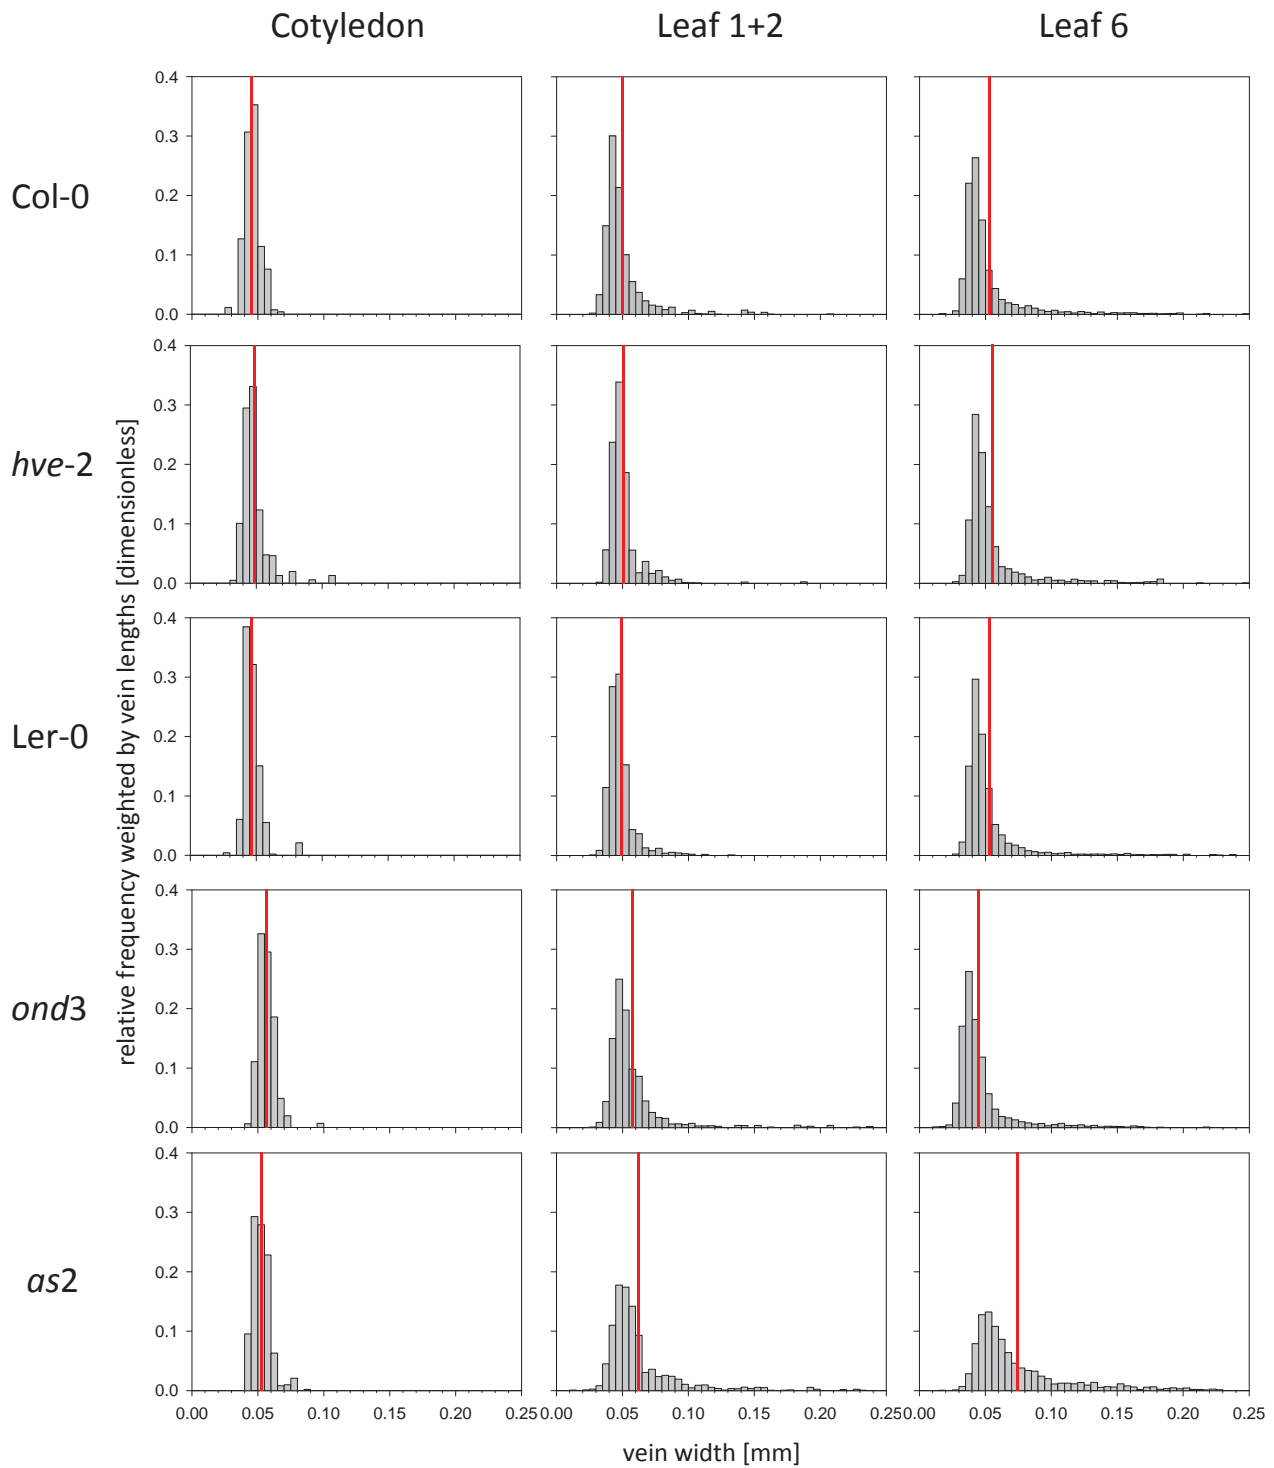

Supplemental Figure S1: Histograms showing relative frequency of vein widths for all mutants (*hve-2*, *ond3*, *as2-101*) and respective wild types (*Col-0* and *Ler-0*). The frequency of vein widths was weighted by respective vein lengths.
